# Supplementary material for: Ergonomic Analysis of Dental Work in Different Oral Quadrants: A Motion Capture Preliminary Study among Endodontists
Source: MDPI journal article supplement (doi:10.3390/bioengineering11040400), 2024-04-19
Supplement: s1 [file s1]

## Rapid Upper Limb Assessment (RULA)

The figure shows a worksheet consisting of 15 steps from which an overall attitude (the so-called RULA score) can be derived.

**A. Arm and Wrist Analysis**  
**Step 1: Locate Upper Arm Position:**

**Step 1a: Adjust...**  
 If shoulder is raised: +1  
 If upper arm is abducted: +1  
 If arm is supported or person is leaning: -1

**Step 2: Locate Lower Arm Position:**

**Step 2a: Adjust...**  
 If either arm is working across midline or out to side of body: Add +1

**Step 3: Locate Wrist Position:**

**Step 3a: Adjust...**  
 If wrist is bent from midline: Add +1

**Step 4: Wrist Twist:**  
 If wrist is twisted in mid-range: +1  
 If wrist is at or near end of range: +2

**Step 5: Look-up Posture Score in Table A:**  
 Using values from steps 1-4 above, locate score in Table A

**Step 6: Add Muscle Use Score**  
 If posture mainly static (i.e. held >10 minutes), Or if action repeated occurs 4x per minute: +1

**Step 7: Add Force/Load Score**  
 If load < 4.4 lbs. (intermittent): +0  
 If load < 4.4 to 22 lbs. (static or repeated): +1  
 If load < 4.4 to 22 lbs. (static or repeated): +2  
 If more than 22 lbs. or repeated or shocks: +3

**Step 8: Find Row in Table C**  
 Add values from steps 5-7 to obtain Wrist and Arm Score. Find row in Table C.

**Table A**

| Upper Arm | Lower Arm | Wrist Score |             |             |             |
|-----------|-----------|-------------|-------------|-------------|-------------|
|           |           | Wrist Twist | Wrist Twist | Wrist Twist | Wrist Twist |
| 1         | 1         | 1           | 2           | 2           | 3           |
| 2         | 2         | 2           | 3           | 3           | 4           |
| 3         | 3         | 3           | 4           | 4           | 5           |
| 4         | 4         | 4           | 5           | 5           | 6           |
| 5         | 5         | 5           | 6           | 6           | 7           |
| 6         | 6         | 6           | 7           | 7           | 8           |

**Table C**

| Wrist, Arm Score | Neck, Trunk, Leg Score |   |    |    |    |    |    |
|------------------|------------------------|---|----|----|----|----|----|
|                  | 1                      | 2 | 3  | 4  | 5  | 6  | 7+ |
| 1                | 1                      | 2 | 3  | 4  | 5  | 6  | 7  |
| 2                | 2                      | 3 | 4  | 5  | 6  | 7  | 8  |
| 3                | 3                      | 4 | 5  | 6  | 7  | 8  | 9  |
| 4                | 4                      | 5 | 6  | 7  | 8  | 9  | 10 |
| 5                | 5                      | 6 | 7  | 8  | 9  | 10 | 11 |
| 6                | 6                      | 7 | 8  | 9  | 10 | 11 | 12 |
| 7                | 7                      | 8 | 9  | 10 | 11 | 12 | 13 |
| 8+               | 8                      | 9 | 10 | 11 | 12 | 13 | 14 |

**Scoring: (final score from Table C)**  
 1-2 = acceptable posture  
 3-4 = further investigations, change may be needed  
 5-6 = further investigations, change soon  
 7 = investigate and implement change

**B. Neck, Trunk and Leg Analysis**  
**Step 9: Locate Neck Position:**

**Step 9a: Adjust...**  
 If neck is twisted: +1  
 If neck is side bending: +1

**Step 10: Locate Trunk Position:**

**Step 10a: Adjust...**  
 If trunk is twisted: +1  
 If trunk is side bending: +1

**Step 11: Legs:**  
 If legs and feet are supported: +1  
 If not: +2

**Table B: Trunk Posture Score**

| Neck Posture Score | Trunk Posture Score |      |      |      |      |      |
|--------------------|---------------------|------|------|------|------|------|
|                    | Legs                | Legs | Legs | Legs | Legs | Legs |
| 1                  | 1                   | 2    | 3    | 4    | 5    | 6    |
| 2                  | 2                   | 3    | 4    | 5    | 6    | 7    |
| 3                  | 3                   | 4    | 5    | 6    | 7    | 8    |
| 4                  | 4                   | 5    | 6    | 7    | 8    | 9    |
| 5                  | 5                   | 6    | 7    | 8    | 9    | 10   |
| 6                  | 6                   | 7    | 8    | 9    | 10   | 11   |

**Step 12: Look-up Posture Score in Table B:**  
 Using values from steps 9-11 above, locate score in Table B

**Step 13: Add Muscle Use Score**  
 If posture mainly static (i.e. held <10 minutes), Or if action repeated occurs 4x per minute: +1

**Step 14: Add Force/Load Score**  
 If load < 4.4 lbs. (intermittent): +0  
 If load < 4.4 to 22 lbs. (intermittent): +1  
 If load < 4.4 to 22 lbs. (static or repeated): +2  
 If more than 22 lbs. or repeated or shocks: +3

**Step 15: Find Column in Table C**  
 Add values from steps 12-14 to obtain Neck, Trunk and Leg Score. Find Column in Table C.

**Neck Score**

**Trunk Score**

**Leg Score**

**Posture Score A**  
 +  
**Muscle Use Score**  
 +  
**Force / Load Score**  
 =  
**Wrist & Arm Score**

**Neck, Trunk, Leg Score**  
 =  
**Force / Load Score**

**RULA Score**

**Figure S1.** The Rapid Upper Limb Assessment (RULA) worksheet.<sup>49</sup>

How the RULA assessment works, in detail, using the worksheet is described by Maurer-Grubinger et al.<sup>49</sup>

At the end, an overall score is read off a table for the right and left sides of the body; this assesses the ergonomic risk according to the following categorisations<sup>41</sup>:

- Score 1-2: "Posture is acceptable if it is not maintained or repeated for long periods".
- Score 3-4: "Further investigation is needed and changes may be required".
- Score 5-6: "Investigation and changes are required soon".
- Score 7: "Investigation and changes are required immediately".
